# Supplementary material for: Physiological activation of human and mouse bitter taste receptors by bile acids
Source: PubMed Central journal article supplement (PMC10247784; doi:10.1038/s42003-023-04971-3), 2023-06-07
Supplement: 42003_2023_4971_MOESM2_ESM.pdf [file 42003_2023_4971_MOESM2_ESM.pdf]

## Description of Additional Supplementary Files

**File name:** Supplementary Data 1

**Description:** The source data for figures 2 and 3

**File name:** Supplementary Data 2

**Description:** The source data for figures 4 and 6

**File name:** Supplementary Data 3

**Description:** The source data for figure 5
